# Supplementary material for: Comparative Transcriptome, Metabolome, and Ionome Analysis of Two Contrasting Common Bean Genotypes in Saline Conditions
Source: Front Plant Sci. 2020 Dec 10;11:599501. doi: 10.3389/fpls.2020.599501 (PMC7758407; doi:10.3389/fpls.2020.599501)
Supplement: Supplementary file 11 [file Table_7.XLSX]

## Sheet: Factor Scores
	F1	F2	F3	F4	F5	F6	F7	F8	F9	F10	F11	F12	F13	F14	F15	F16	F17	F18	F19	F20	F21	F22	F23	F24	F25	F26	F27	F28	F29	F30	F31	F32	F33	F34	F35	F36	F37	F38	F39
ILC	-4.74831	-1.1771	6.19722	0.0366783	0.681841	0.907256	1.66308	0.0834741	-4.10628	2.04939	1.19609	0.0473326	0.204467	-1.19526	-0.719644	-0.367902	-0.337533	-1.58538	-0.483121	0.696485	-0.592853	-0.263463	1.03196	-0.33485	-0.451099	-0.145848	-0.101843	-0.238024	-0.396277	-0.208513	0.0399638	-0.260182	0.0887971	-0.203196	0.0350759	0.00780488	0.0537072	-0.00474243	-0.057129
ILC	-5.07098	-1.66142	4.44927	-0.272681	0.877869	-2.51511	-0.563886	-0.396264	-1.84444	0.0570967	0.527162	0.148235	1.61413	-1.74122	0.945506	0.365729	0.967276	1.04899	1.20422	-0.790104	-0.505759	0.332196	-0.304713	0.0699729	1.05333	-0.141217	0.704109	0.223604	0.341664	-0.188237	-0.060034	0.0973071	-0.439765	0.516256	-0.0323487	-0.00548409	0.123484	-0.0570908	0.0948807
ILC	-5.14796	-1.30353	2.22654	0.981516	-0.556477	-3.97253	-1.86601	1.46882	-1.08533	-0.960352	-1.6778	0.299682	0.0376893	0.464153	-0.891019	0.0384582	-0.0902852	0.787541	0.709007	-0.152164	0.0876723	-0.494287	-0.650008	-0.22363	0.114728	-0.131849	-0.155442	0.326482	-0.166227	-0.148682	0.264523	-0.361506	0.723234	-0.433972	0.474104	0.106547	-0.50385	0.0148595	-0.0576183
ILC	-4.95451	-0.0522041	1.58572	1.34547	-0.254807	-2.98275	-1.83599	1.62755	-0.871078	-0.956367	-2.16913	0.207721	0.998805	0.726867	-1.40234	-0.248516	-0.0479872	-0.402365	-0.541626	0.681005	0.403287	0.350578	-0.18073	-0.484347	-0.310199	0.423911	-0.409637	0.109053	0.536612	0.60234	-0.013281	0.588408	-0.592569	-0.41901	-0.358908	-0.077493	0.31591	0.0189505	-0.00525247
ILC	-7.43834	-4.95522	8.75246	-0.650202	1.19628	-0.513363	1.70516	-3.91064	3.47312	-0.68834	-0.276163	-1.55109	-2.02051	0.548337	-0.308269	0.386381	-0.739079	0.274787	-0.384342	-0.0781487	0.21944	-0.0903351	-0.0493233	0.0857781	-0.17792	0.112444	-0.00580615	0.0598074	-0.0156856	0.0776288	-0.0600793	0.095513	-0.0128849	0.124837	-0.0285322	0.00247014	0.0212193	0.0177449	0.00458205
ILT	-5.43317	5.20884	0.231058	1.399	3.40873	0.106056	-2.06778	0.384547	-0.369956	0.684874	0.902764	0.34074	-1.64088	0.513155	-0.381868	-0.531864	2.44112	1.5812	-1.47226	-0.685783	0.112169	-0.0590504	0.752888	0.852657	-0.339054	-0.154786	-0.243799	0.103591	-0.169597	0.10227	0.264161	-0.0822959	-0.104223	0.00958959	-0.132717	-0.166658	-0.0636934	0.0427065	-0.00403559
ILT	-3.4585	2.94012	-0.211633	1.44852	0.533771	-1.35492	-1.12847	0.466359	0.84903	0.195856	0.656932	-0.465859	0.12332	0.00831498	0.269501	2.01837	1.17218	-1.26782	-0.140103	-0.241886	0.10732	0.499367	-0.498157	0.529885	-0.0204293	1.00198	0.40371	-1.01736	-0.0704755	-0.297107	-0.569321	0.0449418	0.412477	-0.278053	-0.0659659	0.364777	0.0782368	-0.126732	-0.0218874
ILT	-4.98769	4.10863	-0.88263	1.80413	1.51315	0.78618	-2.29494	1.13505	0.86674	-0.156541	-0.698705	-0.524312	-0.047937	-0.151593	0.251603	0.49462	-1.8034	0.0832993	1.02872	0.298566	-0.292696	-0.799284	0.517087	1.13752	0.531253	-0.786635	0.39541	0.264336	-0.602087	-0.0797972	-0.357609	0.131253	0.101944	-0.355592	-0.169119	-0.405331	0.317576	-0.00153702	-0.0343512
ILT	-5.93646	5.25613	-0.444317	1.27358	2.62699	2.22501	-2.05867	-0.575195	0.401247	2.31908	1.01556	-0.313401	0.465543	-1.05999	0.885851	-1.38539	-1.78063	1.63903	-0.129362	0.523754	0.232573	0.0949085	-0.857984	-0.92169	-0.320908	0.727253	-0.0175603	-0.234169	0.235541	0.0222641	0.0252154	0.0826442	0.155614	0.0183068	0.0558134	0.251146	-0.00263821	-0.0228438	-0.0147915
ILT	-4.98552	4.56574	-0.730298	1.91215	1.34843	0.409222	-3.36745	0.496139	1.10151	0.179587	0.672718	-0.362056	-0.797815	0.897588	0.0212293	0.710279	-0.520886	-2.27283	0.630965	-0.336012	-0.463147	0.565027	0.147707	-0.478406	0.0210536	-0.612208	-0.366874	0.21556	0.418443	0.11674	0.360367	-0.330247	-0.478745	0.523942	0.271783	0.137677	-0.235573	0.0420756	0.0263501
IRC	4.4369	-3.48215	1.12827	0.93962	-5.46509	-1.62452	-1.77024	3.13049	-0.14732	-0.646931	2.90344	0.0458295	-1.0123	0.896116	-0.254079	-0.733377	-0.768791	0.605038	0.985455	-0.8898	0.014598	-0.815598	0.260998	0.225816	-1.00717	0.336303	-0.207419	-0.443499	0.075282	-0.106349	-0.11425	-0.0745008	-0.0174917	0.365116	-0.156822	0.00149214	0.184997	0.00562464	0.0442007
IRC	4.74995	-2.58188	1.61221	1.89415	-3.39722	0.754702	-1.03512	1.13612	1.45254	1.86171	3.03338	0.295056	0.732646	0.710454	-0.0170826	0.983166	0.637608	-0.0441923	-0.830322	0.92361	0.589477	0.521481	-0.376495	-0.670785	0.400955	-0.720073	0.555427	0.76461	-0.0790705	0.0993132	0.251897	0.456635	0.413363	-0.15105	-0.139679	-0.123223	-0.0115697	0.0033618	0.00984888
IRC	6.02793	-1.72888	2.32328	3.43264	-1.69804	2.98565	0.478428	0.509512	-1.72088	-0.615607	-0.730243	0.409083	-1.52152	-0.939487	2.20794	0.303598	0.0324223	0.0644443	0.185824	0.438856	0.335025	-0.13285	-0.440112	0.937804	0.529272	-0.417795	-0.689543	-0.499639	0.198189	0.832999	0.101107	0.385809	-0.0239049	-0.0876209	0.0551431	0.263138	-0.181344	0.00835238	-0.026701
IRC	5.33261	-1.0461	2.25221	3.3546	-1.37658	4.23055	-0.0986125	-1.05356	1.93446	1.27105	-1.11001	-0.39533	3.51316	0.564762	-1.98114	-0.348546	0.822494	0.269046	0.54994	-0.220795	-0.0743132	-0.525864	-0.0890678	0.645881	0.0125968	0.039723	-0.493153	-0.322365	-0.0230288	-0.0786162	0.017691	-0.341864	-0.218077	0.0408219	0.14041	0.0049634	-0.051627	-0.00532672	-0.013339
IRC	5.18191	-1.90596	1.50678	3.48897	-2.7664	2.68374	-1.63007	0.752504	0.343538	-1.10433	-2.47868	0.51624	-0.929737	-0.603004	1.76357	-0.47789	0.140698	-0.166476	-0.591375	-0.214729	-0.179087	1.03421	0.334037	-0.423746	-0.348555	0.742713	0.743076	0.422902	0.00127973	-0.627041	0.00972277	-0.55511	-0.214241	-0.207433	0.00989866	-0.299997	0.0111303	-0.0291636	-0.0202932
IRT	4.02216	1.51755	-0.632228	1.49017	-0.517682	-3.18663	-0.173583	-1.17113	2.64365	-0.94526	-0.875423	0.571851	0.836272	-1.12191	1.2574	-1.26994	0.844559	-0.210551	0.0598004	0.00704009	-1.18996	-0.295566	1.00902	-1.21754	0.00722693	-0.604229	-0.243102	-0.603661	-0.489397	0.169104	0.0541898	0.314065	0.313349	0.0862499	-0.196859	0.158337	0.0202996	0.0485429	-0.0598846
IRT	5.17327	2.77386	-0.916325	1.39244	-0.922685	-4.55708	2.39017	0.399207	0.873294	-0.603951	1.34048	-0.0670465	0.139921	-0.456443	0.31202	-0.243127	-0.512878	0.207744	-1.39056	1.62281	0.138446	-0.110769	-0.660612	0.572314	0.61167	-0.0388603	-0.418103	-0.200727	-0.170261	-0.406554	0.00564556	-0.606772	-0.594517	0.0729254	0.350741	-0.133026	0.0595665	0.00609334	-0.0335648
IRT	7.54947	4.69188	-0.299134	3.34388	1.74501	1.06921	3.50914	-0.360456	-1.32672	-0.171154	-0.333005	-0.458292	-1.55021	0.605147	-0.662265	0.851074	0.716498	0.173237	0.568252	-0.766	-0.117299	-1.08523	-1.15314	-1.52143	-0.0980386	-0.291114	-0.147624	0.129035	-0.0648671	-0.125074	-0.447445	0.012195	-0.076197	-0.010301	-0.00813972	-0.265864	0.184621	-0.00472608	0.0126394
IRT	5.55741	3.83276	-0.447834	3.47118	0.430176	-0.374109	2.41749	0.169902	-1.28322	-0.770239	-1.53389	-0.014635	-0.30584	1.22315	-1.7016	-0.564038	-0.865589	0.141601	-0.33666	0.450546	0.531176	0.502696	0.713585	0.379503	0.360595	0.110991	1.05333	-0.0936218	0.0345303	-0.100518	0.258097	0.331262	0.378283	0.732998	-0.0856367	0.348137	-0.0428623	-0.0465179	0.0728836
IRT	5.79905	4.61088	-0.33404	1.67239	0.899023	-2.26836	4.14169	-1.37143	0.508272	0.0989323	1.4912	0.0506733	1.22604	-0.744229	0.818681	0.303912	-0.609482	-0.254983	0.83768	-1.07581	0.366616	0.478479	0.771011	0.609795	-0.787441	0.528309	-0.114984	0.734695	0.450509	0.309278	0.216186	0.0724479	0.0685619	-0.47769	-0.0507965	-0.123031	-0.194863	0.0251343	-0.0169468
TLC	-5.89635	-3.74659	-2.15676	-0.286791	0.470848	-0.969177	2.37493	0.54417	1.12218	3.64568	-1.36786	4.26028	-0.886601	1.22894	0.473041	0.683734	-0.0394108	0.294683	0.863699	0.355239	0.334432	-0.0992443	0.476887	-0.108139	0.185605	0.289798	-0.0592792	-0.150967	0.0109993	0.0664558	-0.123998	-0.17063	-0.139468	0.121029	0.029916	-0.0419914	0.0375407	0.0576986	-0.0218655
TLC	-5.81	-3.25522	-1.95688	-0.391591	0.975175	-0.53145	1.83299	1.01733	-0.679929	1.02333	-0.843051	-2.05852	1.27574	2.54915	2.59759	-1.36008	0.44144	-0.686523	-0.572143	-0.370468	0.13537	-0.651798	-0.467381	0.392577	-0.572477	-0.45056	0.326984	0.332428	-0.0437152	-0.196304	-0.234821	0.160986	-0.0704453	0.0287913	0.132254	0.277248	0.0438668	0.11234	0.00420008
TLC	-6.56718	-2.05256	-1.49454	-1.54541	2.22857	2.48601	2.25435	4.26712	0.876077	-2.0741	0.532612	-1.88048	0.421222	-0.323487	0.399439	0.667678	0.722746	0.47557	0.635333	1.05338	0.683288	-0.345644	1.18215	-0.683417	0.40833	0.672806	-0.468958	0.10367	0.0510406	-0.0753318	0.0878396	0.0791846	0.0493305	0.172227	0.152335	-0.104966	-0.0786817	-0.12983	-0.0276675
TLC	-5.73084	-1.10542	-0.92253	-1.24748	1.27363	2.02734	1.93871	2.23595	0.866698	-2.37064	0.034958	2.01109	0.888676	-1.56376	-0.697003	1.00258	-0.334716	0.455658	-0.885714	0.0703367	-0.909546	0.256509	-0.659905	0.259116	-1.38273	-0.840701	0.427079	0.0023331	0.190589	0.157607	-0.210444	-0.118946	0.0734783	0.167224	0.0484484	0.154738	-0.00390264	0.16393	0.03515
TLC	-5.8836	-3.45491	-1.7763	0.212529	0.881852	0.833102	1.82337	1.40874	0.0771426	-0.636672	0.721188	0.595497	0.458188	0.203273	-0.414698	-0.989986	-1.07023	-0.522545	-1.03414	-2.12815	0.213331	0.983136	-0.52105	-0.188148	1.1137	-0.0737502	-0.42242	-0.337031	-0.44597	0.170712	0.119154	-0.135689	0.0985777	-0.0978981	-0.313113	-0.227609	-0.0694563	-0.234248	0.0577352
TLT	-5.62482	2.04271	-1.38924	-1.26108	-3.38181	0.546434	-0.111978	-2.14497	-0.883734	-0.210131	-0.787944	0.305643	0.226061	-0.230467	0.311419	0.148631	0.109365	-0.307784	-0.328081	0.0719791	-0.136534	0.507839	-0.128418	0.360387	0.0838464	0.123414	-1.26994	0.251121	0.430684	-0.663529	-0.0139135	0.358352	0.771816	0.403219	0.129607	-0.36993	0.263864	0.187446	0.130799
TLT	-5.56361	2.17066	-2.03286	-1.84465	-3.69589	0.621713	-0.190982	-1.50267	-0.0585904	-0.661014	-0.0356863	-0.0955156	-0.0603386	-1.31029	-0.260147	-0.255422	0.512193	-0.695234	-0.0851385	-0.214223	1.34939	-1.07532	-0.0972986	-0.165374	0.470845	0.424883	0.401165	0.473883	-0.292114	0.763546	0.0772814	-0.78455	0.114057	0.102126	-0.19997	0.294872	0.215962	0.286012	0.0306168
TLT	-5.78654	1.10529	-2.50646	-1.84627	-2.85583	0.858818	0.372097	-1.47771	0.257829	-0.244182	-0.0638244	0.52805	-0.449207	-0.903916	-0.343583	-0.100552	0.037388	-0.49192	-0.107206	-0.00407898	0.458267	-1.60449	-0.169256	0.0483744	-0.0339372	-0.200942	0.483939	-0.40137	0.362994	-0.827957	0.55948	0.577563	-0.451621	-0.285312	-0.329083	-0.0802619	-0.397307	-0.12263	0.0635858
TLT	-4.95235	1.47069	-2.30468	-1.77025	-3.95214	0.0792082	0.00896193	-1.899	-0.332257	0.0894316	0.108386	-0.193651	-0.327625	-0.261094	-0.592191	-0.931817	0.518049	-0.0814221	0.265478	0.221276	0.190403	0.615832	0.0581248	0.0431757	-0.460941	-0.18107	0.443026	-0.0139254	-0.164438	0.642818	-0.706127	0.268647	-0.109208	0.151751	0.674688	-0.354629	-0.117506	-0.424014	-0.149457
TLT	-5.66658	0.74688	-2.63794	-1.13058	-2.88981	1.39266	1.55283	-2.23004	-1.13948	-1.12584	1.06777	-0.815236	-0.404169	2.05956	-0.189208	0.101411	0.220305	1.07758	1.13182	0.800119	-1.55552	1.36422	-0.0381836	-0.092679	0.231545	-0.0788943	0.0551416	-0.210941	-0.123358	-0.0050338	0.293945	-0.294141	-0.187948	-0.452533	-0.325284	0.219695	0.0196613	0.124731	-0.0509461
TRC	4.07379	-4.99369	-3.61935	0.796487	0.76272	0.656341	-1.02888	-0.852773	-0.0239071	-0.1276	0.974928	0.134422	-0.758224	-0.490284	-1.17572	-0.0189089	-0.391079	0.178801	-0.832784	-0.853745	-0.935171	-0.449488	0.773374	-0.0805606	0.846292	0.373679	0.0558442	0.356497	0.287374	-0.156129	-0.341429	0.472369	-0.205167	-0.384624	0.675322	0.424215	0.128308	0.212067	-0.0380241
TRC	3.80128	-5.03818	-3.92806	0.469624	1.54179	-0.976524	-0.439636	-0.124022	0.125382	1.27749	-0.768994	-1.13568	-1.09214	-2.1025	-1.00319	-0.133223	0.38664	-0.134764	0.97772	0.288864	0.565379	0.990284	-0.516979	0.341095	-0.700243	-0.167758	-0.560972	0.577488	-0.800458	-0.379014	0.134043	0.188281	-0.202442	0.0996634	-0.239787	0.370834	0.0492529	-0.109985	0.069341
TRC	5.90228	-2.33201	0.240705	-1.05009	4.68204	0.842919	-2.40875	-3.18511	-0.910029	-2.80759	1.59758	2.33138	0.644642	1.24346	0.399804	-0.76628	0.119806	-0.35818	0.414071	0.759792	1.14722	-0.136821	0.16022	-0.0640285	-0.0384142	-0.242648	-0.205119	0.168401	0.128456	-0.272848	-0.557701	-0.235199	0.0873318	-0.0921965	-0.183601	0.11705	-0.0323526	-0.156261	0.0820558
TRC	4.59602	-5.43753	-2.76617	-0.360432	3.88532	-0.567615	-0.766436	-0.711572	-0.292851	0.115215	0.272691	-0.984936	-0.264543	-0.490024	-0.391647	-0.474666	0.27699	-0.436262	0.57328	0.104318	0.609563	0.369332	-0.373217	0.100675	-0.11157	-0.160672	0.611426	-0.835642	0.443072	0.133188	0.552566	-0.0976899	0.246638	0.0276374	0.122903	-0.571151	0.12755	0.313863	-0.291408
TRC	4.09855	-4.59781	-3.48804	0.419242	1.48332	-0.865983	-1.56998	-1.79652	-1.04921	0.474557	-0.257776	-0.782351	0.511176	0.336035	0.367522	1.2402	-0.413346	0.0494498	-0.764344	0.544374	-1.55345	-0.962969	-0.0804226	0.0809614	-0.246007	0.82354	0.110384	0.0981747	-0.205206	0.625819	0.148807	-0.138064	0.104029	0.285319	-0.199029	-0.356249	-0.22569	-0.13882	0.297504
TRT	7.57515	2.97251	2.87966	-5.61978	1.54384	0.81308	0.653925	2.62458	1.49912	0.509433	-0.0144665	0.586443	-1.11199	-0.0158531	-0.563508	-1.93802	0.720098	-1.04283	0.623368	0.497286	-1.386	-0.134085	-0.802926	0.572952	0.466406	0.547545	0.175526	0.367706	0.237578	0.134836	0.0147431	0.0903164	0.212646	-0.108929	-0.0665108	-0.0330665	-0.00395946	-0.0302045	0.101609
TRT	6.98179	2.73842	1.71189	-4.95106	-0.239134	0.112811	-0.734608	0.656316	-0.282457	0.422479	-0.553037	-0.553602	0.338045	0.300338	0.124146	0.438726	-0.351146	0.395163	0.0649502	-0.301148	0.964829	0.833903	0.356913	-0.369823	-0.0743337	-0.16134	0.114204	-0.603261	-0.551718	0.0366112	-0.265267	0.217146	-0.306833	-0.177265	0.278231	-0.159594	-0.215562	0.376771	0.418264
TRT	6.51952	2.532	1.68023	-4.88823	0.0919252	0.703225	-1.13461	-0.298252	-0.762156	-0.649093	-0.300172	0.932783	0.825368	0.850024	0.519068	1.16196	-0.529996	0.100646	-0.398825	-0.532877	-0.10321	-0.193174	-0.31241	0.0148776	-0.10205	0.578755	-0.206642	0.271324	-0.766023	-0.0978566	0.365437	0.401713	-0.230488	0.351805	-0.0195237	0.0703517	-0.0146913	0.0181068	-0.496348
TRT	6.35953	0.805611	-0.0887721	-4.24541	-0.0461717	-0.126015	-0.337434	-0.140409	0.093316	0.615305	-1.10793	-0.388291	-0.0656304	0.249357	0.391491	0.843737	-0.199335	0.523338	-0.346964	-0.449844	0.216175	-0.138531	0.365278	-0.14183	-0.195155	-0.689812	-0.0055529	-0.215905	0.437004	0.0589964	0.752273	-0.405829	0.162128	-0.281609	0.299636	0.255581	0.504508	-0.447552	0.116775
TRT	5.90472	-0.182773	-0.810462	-3.21696	-1.06652	-0.745096	-0.503216	0.68784	-0.195339	1.63543	-1.06606	-1.57774	-0.233908	-0.473372	-0.366612	0.395315	-0.434081	0.535219	-0.654507	-0.103875	-0.0108992	0.163866	0.51655	-0.0906899	0.329434	-0.565279	-0.246011	0.0654112	0.768132	-0.0820348	-0.898615	-0.433824	0.100582	0.102451	-0.634881	0.0684803	-0.314132	0.00581346	-0.23151

## Sheet: Contribution of Observations
	F1	F2	F3	F4	F5	F6	F7	F8	F9	F10	F11	F12	F13	F14	F15	F16	F17	F18	F19	F20	F21	F22	F23	F24	F25	F26	F27	F28	F29	F30	F31	F32	F33	F34	F35	F36	F37	F38	F39
ILC	1.81975	0.337343	14.5149	0.000630436	0.23662	0.610946	2.23255	0.00658851	24.7571	6.8172	2.48916	0.00461779	0.0999745	3.60469	1.47224	0.510381	0.470332	11.1454	1.14677	2.65082	1.98049	0.415336	8.33076	0.938324	1.93724	0.235898	0.129585	0.899171	3.05721	0.881081	0.035284	1.56804	0.21403	1.28101	0.0444468	0.00264354	0.195373	0.00221532	0.423762
ILC	2.07548	0.672061	7.48167	0.0348444	0.392234	4.69524	0.256661	0.148475	4.99497	0.0052915	0.483516	0.0452915	6.23045	7.6498	2.54139	0.504368	3.86254	4.87947	7.12484	3.41134	1.44134	0.660314	0.726343	0.0409742	10.5625	0.221153	6.19404	0.793529	2.27261	0.718054	0.0796231	0.219328	5.2495	8.26894	0.037804	0.00130515	1.03281	0.321045	1.16886
ILC	2.13897	0.413705	1.87362	0.451457	0.157609	11.7133	2.81065	2.03995	1.72951	1.49699	4.89783	0.185113	0.00339686	0.543583	2.25693	0.0055771	0.0336516	2.75029	2.46983	0.126526	0.0433116	1.46191	3.30519	0.418515	0.125309	0.192786	0.301876	1.69168	0.537935	0.447988	1.54586	3.02716	14.1982	5.8431	8.12025	0.492645	17.195	0.0217491	0.431053
ILC	1.98123	0.000663525	0.950325	0.848339	0.0330453	6.60355	2.72093	2.50469	1.11408	1.48458	8.18641	0.0889352	2.38563	1.33307	5.59048	0.232883	0.00950658	0.717911	1.44134	2.53429	0.916449	0.735412	0.255516	1.9632	0.916052	1.99283	2.09649	0.188747	5.60595	7.35246	0.00389678	8.01976	9.53135	5.44715	4.65361	0.260602	6.75967	0.0353734	0.00358209
ILC	4.46568	5.97824	28.9522	0.198115	0.728364	0.19561	2.34698	14.4603	17.711	0.769065	0.132695	4.95896	9.76258	0.758646	0.27015	0.562939	2.25504	0.334829	0.725775	0.0333734	0.271338	0.0488287	0.0190311	0.0615749	0.301364	0.140215	0.000421182	0.056769	0.00478995	0.122122	0.0797434	0.211315	0.00450649	0.483513	0.0294098	0.000264787	0.0304974	0.0310158	0.00272602
ILT	2.38255	6.60586	0.0201774	0.917191	5.91387	0.00834868	3.45131	0.139824	0.200957	0.761338	1.41798	0.239309	6.4387	0.664418	0.414544	1.06667	24.601	11.0868	10.6497	2.56998	0.070897	0.0208645	4.43425	6.08414	1.09441	0.265695	0.742602	0.170311	0.559969	0.211955	1.54163	0.156877	0.294853	0.00285312	0.636324	1.20533	0.274782	0.179648	0.00211458
ILT	0.965406	2.10464	0.0169273	0.983262	0.145009	1.36261	1.02792	0.205648	1.0584	0.0622631	0.750868	0.447324	0.0363673	0.000174449	0.206474	15.3614	5.67233	7.1277	0.096441	0.319727	0.0648991	1.49211	1.9413	2.34971	0.00397325	11.1336	2.03625	16.4268	0.0966949	1.78885	7.16076	0.0467848	4.61823	2.3987	0.157203	5.77441	0.414592	1.58199	0.0622009
ILT	2.00786	4.11	0.294428	1.52531	1.16533	0.458762	4.25127	1.21819	1.10301	0.0397752	0.849398	0.566622	0.0054952	0.0579836	0.17996	0.922515	13.4263	0.030769	5.19945	0.487122	0.482739	3.82265	2.09164	10.8285	2.68684	6.86225	1.95338	1.10895	7.05743	0.12904	2.82529	0.399043	0.2821	3.92306	1.03325	7.12973	6.83118	0.000232698	0.153212
ILT	2.84439	6.72637	0.0746118	0.760104	3.51237	3.67456	3.42098	0.312834	0.236389	8.72946	1.79447	0.202448	0.518276	2.83498	2.23082	7.23729	13.0894	11.9125	0.0822205	1.49903	0.304789	0.053898	5.75861	7.1092	0.980397	5.86531	0.00385263	0.870281	1.08009	0.0100452	0.0140467	0.158208	0.657315	0.0103979	0.112538	2.7372	0.000471431	0.0514009	0.0284074
ILT	2.00611	5.07539	0.201568	1.71342	0.925424	0.124297	9.15335	0.232751	1.78149	0.0523488	0.787389	0.270188	1.52211	2.03282	0.00128119	1.90234	1.1201	22.9068	1.95603	0.616972	1.2087	1.9103	0.170672	1.91533	0.00421982	4.15641	1.68162	0.737456	3.4088	0.276179	2.86903	2.52628	6.22136	8.51701	2.66849	0.822572	3.75881	0.174379	0.0901513
IRC	1.58889	2.95218	0.48111	0.413739	15.2013	1.95881	2.52953	9.26636	0.0318659	0.679317	14.6672	0.00432917	2.45052	2.02616	0.183519	2.02808	2.44	1.62329	4.77134	4.32655	0.00120079	3.98029	0.532886	0.426738	9.65713	1.25424	0.537514	3.12167	0.110334	0.229198	0.288376	0.128566	0.00830505	4.136	0.88846	9.6621e-05	2.31809	0.00311619	0.253669
IRC	1.82101	1.623	0.982348	1.68131	5.874	0.422761	0.864883	1.22049	3.09786	5.62577	16.0095	0.179442	1.2836	1.27355	0.000829569	3.64488	1.67834	0.00866012	3.38734	4.66159	1.958	1.62719	1.10887	3.76546	1.53049	5.75007	3.85431	9.27859	0.121719	0.199877	1.40181	4.82996	4.6381	0.707883	0.704835	0.658925	0.00906665	0.00111321	0.0125945
IRC	2.93273	0.727745	2.03998	5.52178	1.4675	6.61637	0.184761	0.245467	4.34813	0.615124	0.927809	0.344934	5.53603	2.22703	13.8586	0.347559	0.00433971	0.0184162	0.169657	1.05245	0.632461	0.105605	1.51526	7.35995	2.66685	1.93574	5.94041	3.962	0.764692	14.0617	0.225841	3.44785	0.0155114	0.238197	0.109851	3.00483	2.22745	0.00687155	0.0925684
IRC	2.29517	0.266437	1.91708	5.27356	0.964472	13.2843	0.00784949	1.04955	5.49445	2.62228	2.14378	0.322132	29.5147	0.804776	11.1577	0.458091	2.79279	0.320985	1.48592	0.266399	0.031118	1.65466	0.0620584	3.49105	0.00151063	0.0174986	3.03848	1.64929	0.0103245	0.125249	0.00691434	2.70714	1.29091	0.0517018	0.712226	0.00106908	0.180532	0.00279482	0.0231024
IRC	2.16727	0.884458	0.858062	5.70447	3.89508	5.34595	2.14481	0.535428	0.173281	1.9795	10.6896	0.549309	2.06711	0.917455	8.84154	0.861165	0.0817239	0.122895	1.71827	0.251964	0.18072	6.40005	0.872865	1.50267	1.1566	6.11734	6.89858	2.83844	3.18836e-05	7.96784	0.00208845	7.13777	1.24589	1.33498	0.00353978	3.90558	0.00839103	0.0837757	0.05347
IRT	1.30573	0.560704	0.151067	1.04062	0.136399	7.53715	0.0243215	1.29686	10.2615	1.4503	1.3334	0.674031	1.67239	3.17588	4.49461	6.08135	2.94464	0.196582	0.0175701	0.00027084	7.97892	0.522724	7.96455	12.4056	0.00049722	4.04877	0.738365	5.78346	4.66285	0.579503	0.0648754	2.28478	2.66522	0.230801	1.40002	1.08797	0.0279109	0.232106	0.465629
IRT	2.16005	1.87335	0.317337	0.908604	0.433304	15.4141	4.61141	0.150689	1.11976	0.592052	3.1264	0.00926545	0.0468173	0.525675	0.276763	0.222893	1.08593	0.191377	9.50045	14.391	0.108005	0.0734177	3.41391	2.74107	3.56184	0.0167469	2.18404	0.639459	0.564361	3.34954	0.000704139	8.52816	9.59413	0.164998	4.44421	0.767933	0.240327	0.00365718	0.146277
IRT	4.6001	5.35971	0.0338184	5.23989	1.54982	0.848542	9.93985	0.122854	2.58443	0.0475476	0.192942	0.43291	5.74673	0.923989	1.24683	2.73127	2.11935	0.13308	1.58653	3.20638	0.0775295	7.04708	10.4022	19.371	0.091503	0.939827	0.272276	0.264252	0.0819175	0.317018	4.42307	0.00344481	0.157599	0.00329215	0.00239355	3.06742	2.30866	0.00220008	0.0207424
IRT	2.49276	3.5766	0.0757976	5.64647	0.094184	0.103882	4.71744	0.0272948	2.41773	0.962959	4.09365	0.000441471	0.223681	3.77488	8.23111	1.19963	3.09311	0.0889129	0.556865	1.10927	1.58985	1.51207	3.98337	1.20526	1.23788	0.136613	13.862	0.139109	0.0232129	0.204754	1.47167	2.54184	3.88427	16.6696	0.264937	5.25961	0.124437	0.213145	0.689712
IRT	2.71424	5.17625	0.0421715	1.31067	0.411365	3.81917	13.8463	1.77839	0.37931	0.0158867	3.86898	0.00529263	3.59463	1.39752	1.90534	0.348278	1.53354	0.288306	3.44765	6.32451	0.757361	1.36989	4.65029	3.11186	5.90305	3.09525	0.165184	8.56675	3.95126	1.93841	1.03253	0.121578	0.127597	7.07967	0.093216	0.656874	2.57191	0.0622254	0.0372892
TLC	2.80608	3.4176	1.75802	0.0385436	0.112836	0.697188	4.5528	0.279997	1.84895	21.5731	3.2554	37.4101	1.87975	3.81073	0.636125	1.7628	0.00641216	0.385072	3.66515	0.689602	0.630223	0.058935	1.77906	0.097863	0.327961	0.931344	0.0439034	0.361713	0.00235536	0.0894983	0.339685	0.674393	0.527991	0.454463	0.0323318	0.0765198	0.0954563	0.327918	0.0620766
TLC	2.7245	2.57994	1.44726	0.0718602	0.484006	0.209637	2.71204	0.978603	0.678783	1.69978	1.2366	8.73424	3.89197	16.3958	19.1816	6.97528	0.804481	2.08998	1.60833	0.749992	0.103258	2.54208	1.70884	1.28974	3.12001	2.25126	1.33581	1.75387	0.0372043	0.780919	1.2182	0.600319	0.134704	0.0257183	0.631889	3.33572	0.130338	1.24309	0.00229046
TLC	3.4809	1.02575	0.844186	1.1192	2.52776	4.58721	4.10224	17.2168	1.12691	6.98256	0.493565	7.28872	0.424291	0.264034	0.45357	1.68098	2.15648	1.00291	1.98322	6.0636	2.6308	0.714858	10.9321	3.90862	1.58731	5.01996	2.74764	0.170571	0.0507177	0.115002	0.170461	0.14524	0.0660554	0.920282	0.838342	0.478135	0.419321	1.6603	0.0993911
TLC	2.65077	0.297509	0.321649	0.729274	0.825606	3.05067	3.03391	4.72723	1.10291	9.12192	0.00212626	8.33634	1.88855	6.17001	1.38106	3.79025	0.462515	0.92068	3.85437	0.0270346	4.66153	0.393701	3.40661	0.561874	18.2019	7.83796	2.27882	8.63907e-05	0.707173	0.503384	0.978403	0.327722	0.146553	0.867601	0.0847973	1.03907	0.00103161	2.64698	0.16042
TLC	2.79396	2.90618	1.19249	0.021167	0.395801	0.515158	2.68364	1.87649	0.00873758	0.657943	0.90494	0.730927	0.50203	0.104257	0.488887	3.69563	4.72856	1.21082	5.25443	24.7492	0.25644	5.78348	2.12382	0.296243	11.808	0.0603179	2.22937	1.80278	3.87203	0.590579	0.313663	0.426473	0.263775	0.297351	3.54182	2.24818	0.326755	5.40487	0.432803
TLT	2.55359	1.01593	0.729423	0.745264	5.8208	0.221625	0.0101215	4.35039	1.14669	0.0716699	1.08022	0.19255	0.122206	0.134017	0.275698	0.0833007	0.0493777	0.420072	0.528846	0.028312	0.105042	1.54317	0.129006	1.0869	0.0669282	0.168906	20.1493	1.00085	3.61114	8.92215	0.00427676	2.97456	16.1698	5.04431	0.60685	5.93869	4.71584	3.46089	2.22136
TLT	2.49832	1.14719	1.56184	1.5946	6.95223	0.286895	0.0294418	2.13506	0.0050403	0.709214	0.00221578	0.0188046	0.00870628	4.33191	0.19239	0.246006	1.08303	2.14335	0.0356138	0.250778	10.2601	6.91886	0.074058	0.228869	2.11055	2.00198	2.01066	3.56405	1.66124	11.8146	0.131945	14.2576	0.353117	0.323589	1.44461	3.77328	3.15903	8.05755	0.121711
TLT	2.70254	0.297442	2.37434	1.5974	4.15097	0.547452	0.111761	2.06472	0.097604	0.0967799	0.00708755	0.574729	0.482542	2.06158	0.33559	0.0381254	0.00577083	1.07305	0.0564685	9.09198e-05	1.18336	15.4041	0.224102	0.0195832	0.0109646	0.447776	2.926	2.55676	2.56523	13.892	6.91534	7.72685	5.53637	2.52558	3.91232	0.279557	10.6918	1.48124	0.524963
TLT	1.9795	0.526611	2.00744	1.46855	7.9497	0.00465676	6.48307e-05	3.40985	0.162088	0.0129819	0.0204393	0.0772952	0.256682	0.172003	0.996936	3.2741	1.10793	0.0293979	0.346277	0.267563	0.20428	2.26927	0.0264291	0.0156002	2.0227	0.36359	2.45217	0.00307762	0.526421	8.37384	11.0156	1.67174	0.323733	0.714464	16.4448	5.4576	0.935232	17.709	2.90029
TLT	2.59165	0.135816	2.62997	0.599002	4.25034	1.43958	1.94637	4.70228	1.90642	2.05734	1.98373	1.36988	0.390634	10.7027	0.10177	0.0387793	0.200365	5.14911	6.29395	3.49837	13.6342	11.136	0.0114055	0.071881	0.510399	0.0690257	0.0379885	0.706191	0.296253	0.0005135	1.90887	2.00408	0.95885	6.35361	3.82252	2.09457	0.0261833	1.53244	0.337
TRC	1.33946	6.07144	4.95088	0.297289	0.296085	0.319744	0.854484	0.687623	0.000839182	0.0264275	1.65374	0.0372439	1.37479	0.606514	3.92966	0.00134823	0.631398	0.141765	3.40746	3.98302	4.92789	1.20892	4.67885	0.0543121	6.81838	1.54852	0.0389627	2.01703	1.60777	0.493989	2.5754	5.16852	1.14259	4.58979	16.4757	7.80954	1.11509	4.42975	0.187727
TRC	1.16626	6.18011	5.83146	0.103353	1.20986	0.707798	0.156014	0.0145439	0.0230821	2.64895	1.02889	2.65844	2.85232	11.1536	2.86097	0.0669252	0.617144	0.080534	4.69673	0.455977	1.80118	5.86789	2.09076	0.973649	4.66808	0.312095	3.93166	5.29283	12.474	2.91112	0.396947	0.82114	1.11244	0.308171	2.07717	5.96777	0.16431	1.19153	0.624293
TRC	2.81174	1.32407	0.0218973	0.516745	11.1572	0.52737	4.68338	9.59249	1.21594	12.7946	4.44066	11.2032	0.993757	3.90131	0.4544	2.21414	0.0592553	0.568899	0.842396	3.15461	7.41604	0.112012	0.200814	0.0343081	0.0140483	0.652943	0.52566	0.45008	0.321243	1.50866	6.87142	1.28138	0.207024	0.263724	1.2178	0.594558	0.0708953	2.40513	0.874234
TRC	1.7049	7.19866	2.89188	0.0608791	7.68315	0.23914	0.474165	0.478764	0.12592	0.0215463	0.129379	1.99954	0.167354	0.60587	0.436048	0.849585	0.31674	0.84397	1.61473	0.0594673	2.09371	0.816199	1.08964	0.0848191	0.118505	0.286287	4.67068	11.0826	3.82188	0.359485	6.74548	0.221057	1.65119	0.0236981	0.545694	14.1564	1.10194	9.70319	11.0258
TRC	1.3558	5.14695	4.59817	0.0823668	1.11983	0.556625	1.98959	3.05175	1.61631	0.365539	0.115614	1.26159	0.624862	0.284914	0.383982	5.79985	0.705343	0.0108433	2.87041	1.61939	13.598	5.54864	0.050596	0.0548539	0.576149	7.52125	0.152231	0.152968	0.819798	7.93681	0.489202	0.441534	0.293757	2.52571	1.43106	5.50757	3.45003	1.89819	11.4919
TRT	4.63145	2.15127	3.13403	14.7999	1.21308	0.490693	0.345171	6.51332	3.29973	0.42124	0.000364126	0.708867	2.95693	0.000634119	0.902701	14.1628	2.1407	4.82237	1.90922	1.35135	10.8244	0.107578	5.04325	2.74718	2.07094	3.32475	0.384926	2.14587	1.09885	0.368435	0.00480199	0.188946	1.22741	0.368134	0.159811	0.0474491	0.00106187	0.0898623	1.34053
TRT	3.93431	1.82578	1.10757	11.4873	0.0291051	0.00944598	0.435601	0.407296	0.117141	0.289712	0.532148	0.631698	0.27327	0.227597	0.0438138	0.725799	0.509036	0.692442	0.0207266	0.495582	5.24541	4.16095	0.996513	1.14456	0.0526032	0.288672	0.16295	5.77581	5.926	0.0271629	1.55457	1.09222	2.55553	0.97491	2.79662	1.10532	3.14734	13.9826	22.7149
TRT	3.43056	1.5609	1.06699	11.1976	0.00430085	0.367056	1.03914	0.0841107	0.852887	0.683865	0.15677	1.79339	1.62906	1.82309	0.765935	5.09109	1.15963	0.0449185	0.781504	1.55171	0.0600235	0.223284	0.763501	0.00185231	0.0991447	3.71458	0.533493	1.16837	11.4238	0.194057	2.95033	3.73798	1.44203	3.83994	0.0137704	0.214784	0.014619	0.0322939	31.9876
TRT	3.26426	0.158015	0.00297834	8.4462	0.00108502	0.0117867	0.0919084	0.0186412	0.0127854	0.614522	2.13575	0.310762	0.0103003	0.156888	0.435699	2.68438	0.164036	1.21449	0.591475	1.10581	0.263325	0.11483	1.04378	0.168341	0.362575	5.27694	0.000385242	0.739824	3.71791	0.0705343	12.5025	3.81497	0.713496	2.46045	3.24348	2.83472	17.2399	19.7297	1.77054
TRT	2.81406	0.0081334	0.248249	4.84967	0.578926	0.412068	0.204402	0.447362	0.0560247	4.34128	1.97735	5.13078	0.130838	0.565393	0.382082	0.589272	0.777884	1.27027	2.10473	0.0589624	0.000669376	0.160673	2.08729	0.0688286	1.03318	3.54361	0.756141	0.0679057	11.4868	0.136378	17.8399	4.35944	0.274609	0.325651	14.5616	0.203509	6.68381	0.00332892	6.95903
